# Supplementary material
Source: publisher figshare collection journal article supplement (https://sage.figshare.com/ndownloader/files/21208140)
Supplement: Supplementary file 1 [file 21208140]

## Online Supplemental Appendix A

Model of Perceptions of Organizational Politics (Reprinted with permission from Ferris, Russ, & Fandt, 1989)

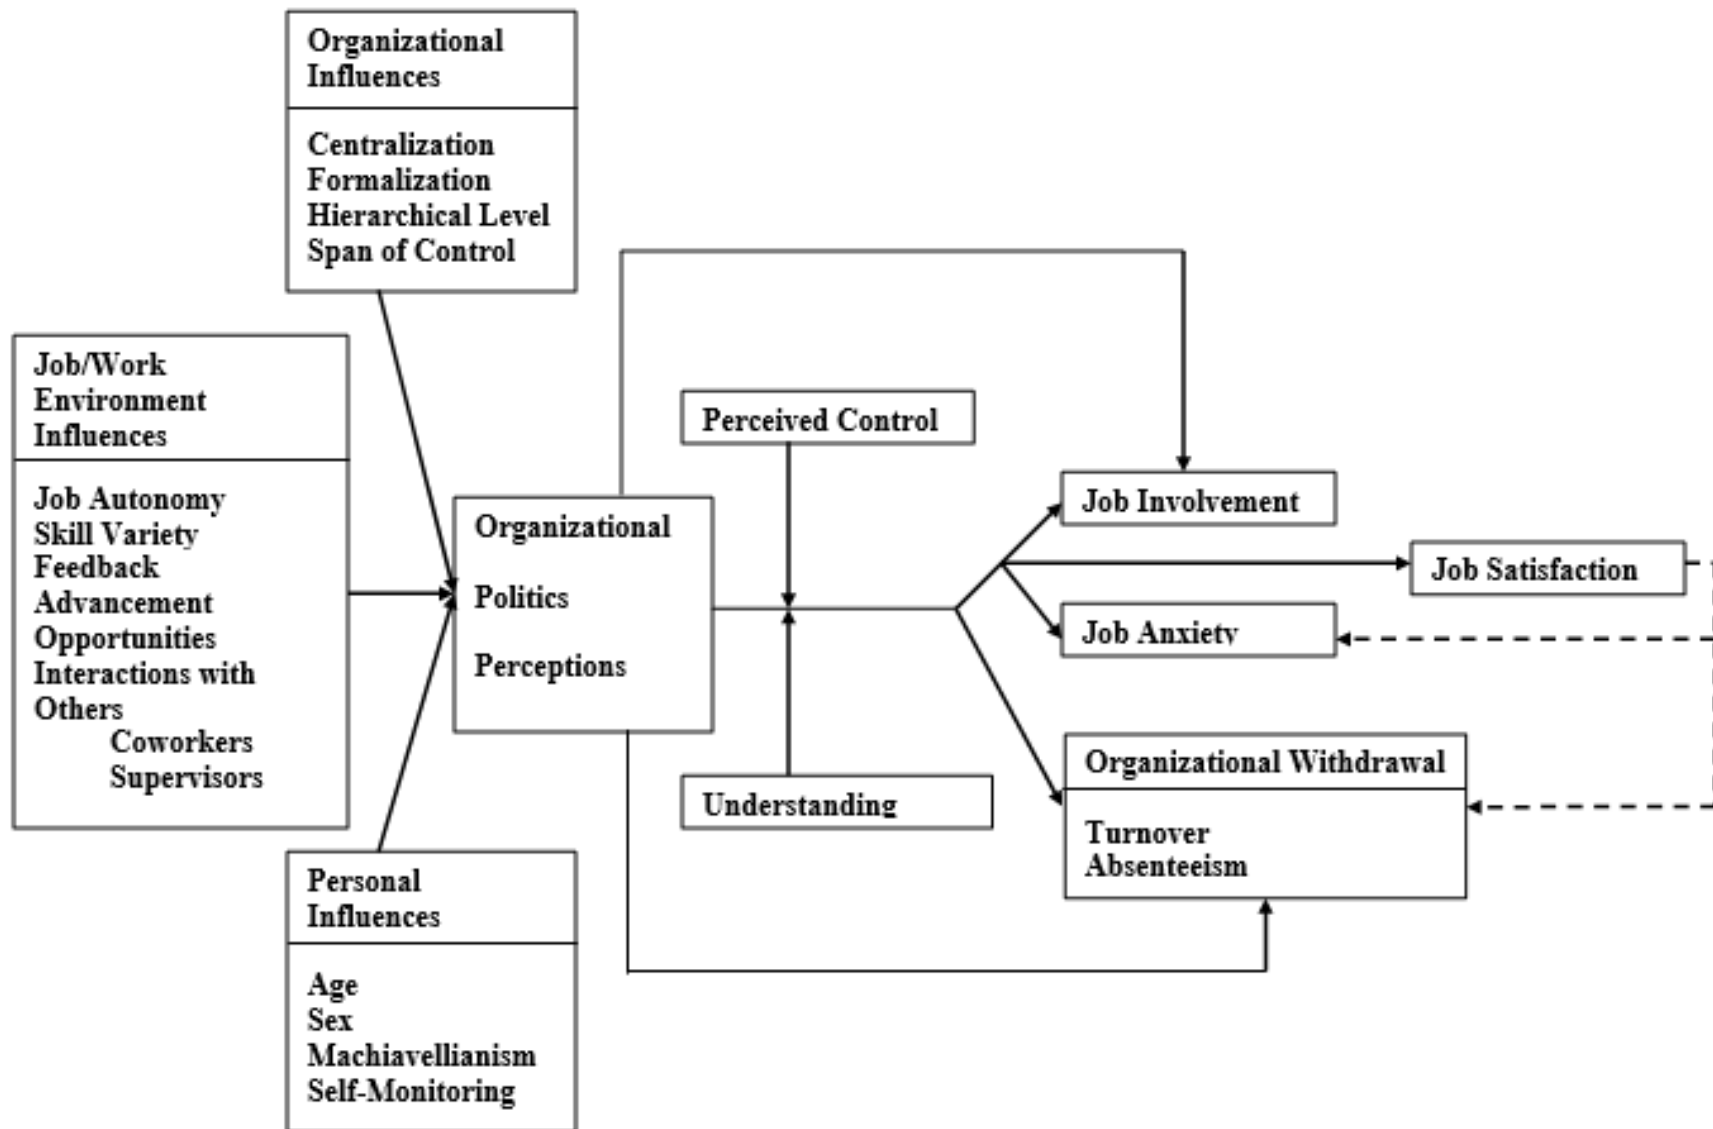

## Online Supplemental Appendix B

Revised Model of Perceptions of Organizational Politics (Reprinted with permission from Ferris, Adams, Kolodinsky, Hochwarter, & Ammeter, 2002)

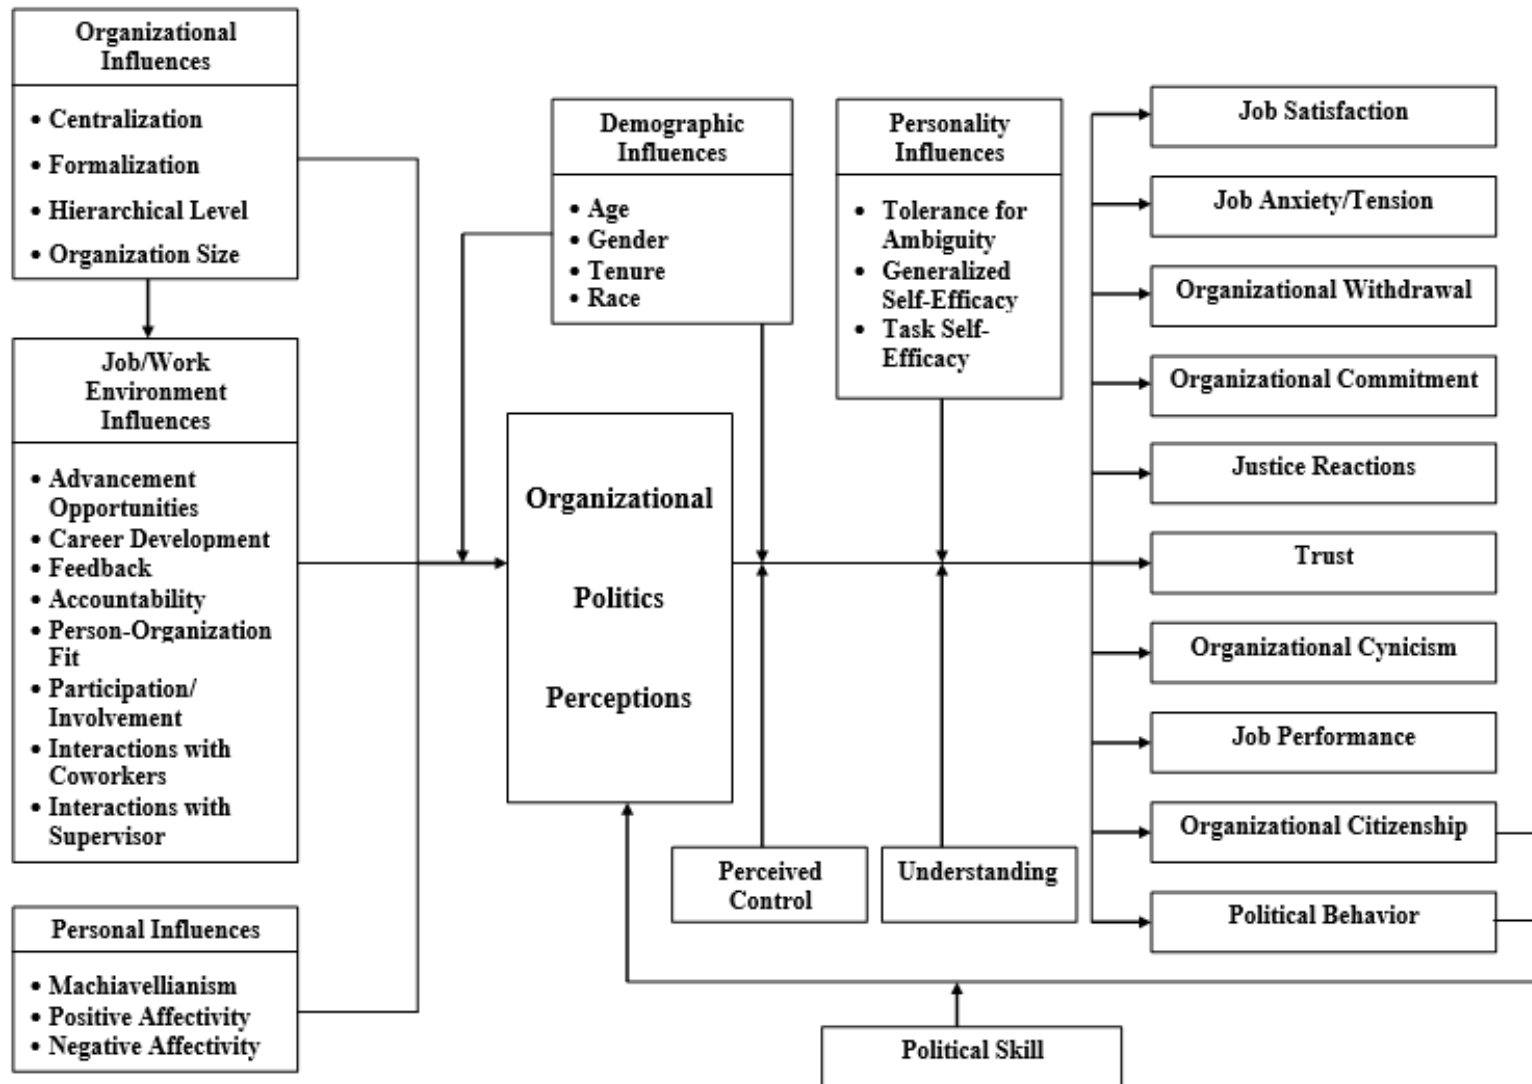

## Online Supplemental Appendix C

### Previous Meta-Analytic Results for Bivariate Relationships Between Perceptions of Organizational Politics and Associated Antecedents and Consequences

| Antecedents                                   | <i>k</i>        | <i>N</i> | ρ    | 95% CI |       |
|-----------------------------------------------|-----------------|----------|------|--------|-------|
|                                               |                 |          |      | Lower  | Upper |
| <i>Demographic</i>                            |                 |          |      |        |       |
| Age                                           | 47 <sup>c</sup> | 18,229   | -.03 | -.00   | .00   |
| Gender                                        | 35 <sup>c</sup> | 15,832   | .00  | -.03   | .03   |
| Tenure                                        | 42 <sup>c</sup> | 15,309   | .05  | .02    | .08   |
| Race                                          | 8 <sup>c</sup>  | 5,058    | .01  | -.04   | .05   |
| Education                                     | 13 <sup>c</sup> | 5,979    | -.02 | -.08   | .04   |
| <i>Personality and individual differences</i> |                 |          |      |        |       |
| Machiavellianism                              | 8 <sup>c</sup>  | 10,706   | .42  | .36    | .49   |
| Self-monitoring                               | 5 <sup>c</sup>  | 632      | -.04 | -.10   | .03   |
| Positive Affect                               | 14 <sup>c</sup> | 7,225    | -.31 | -.34   | -.28  |
| Negative Affect                               | 13 <sup>c</sup> | 6,802    | .41  | .35    | .48   |
| Political skill                               | 6 <sup>e</sup>  | 1, 244   | .01  | -.23   | .24   |
| Locus of control-external                     | 8 <sup>c</sup>  | 8,919    | .31  | .21    | .41   |
| <i>Job and work environment</i>               |                 |          |      |        |       |
| Autonomy                                      | 12 <sup>c</sup> | 3,874    | -.27 | -.35   | -.20  |
| Skill variety                                 | 4 <sup>c</sup>  | 1,755    | -.18 | -.22   | -.13  |
| Feedback                                      | 9 <sup>c</sup>  | 4,997    | -.32 | -.48   | -.16  |
| Advancement opportunity                       | 8 <sup>c</sup>  | 6,685    | -.50 | -.65   | -.35  |
| Leader-member exchange                        | 11 <sup>c</sup> | 4,640    | -.58 | -.63   | -.52  |
| Team-member exchange                          | --              | --       | --   | --     | --    |
| Development opportunity                       | 5 <sup>c</sup>  | 4,783    | -.65 | -.74   | -.56  |
| Accountability                                | --              | --       | --   | --     | --    |
| Person-organization fit                       | --              | --       | --   | --     | --    |
| Participation                                 | 10 <sup>c</sup> | 5,373    | -.57 | -.63   | -.45  |
| Organizational citizenship behavior (OCB)     | --              | --       | --   | --     | --    |
| Political behavior                            | --              | --       | --   | --     | --    |
| Met expectations                              | 5 <sup>c</sup>  | 1,090    | -.61 | -.65   | -.57  |
| Trust                                         | 7 <sup>c</sup>  | 1,987    | -.64 | -.80   | -.47  |
| Cooperation                                   | 6 <sup>c</sup>  | 6,039    | -.32 | -.53   | -.11  |
| <i>Organizational</i>                         |                 |          |      |        |       |
| Centralization                                | 7 <sup>c</sup>  | 5,062    | .53  | .45    | .73   |
| Formalization                                 | 12 <sup>c</sup> | 6,258    | -.18 | -.27   | -.09  |
| Hierarchical level                            | 11 <sup>c</sup> | 6,216    | .07  | -.01   | .14   |
| Span of control                               | 3 <sup>c</sup>  | 619      | .07  | -.01   | .15   |
| Organization size                             | --              | --       | --   | --     | --    |
| Procedural justice                            | 13 <sup>c</sup> | 3,238    | -.59 | -.65   | -.54  |

| Consequences                       | <i>k</i>        | <i>N</i> | $\rho$ | 95% CI |       |
|------------------------------------|-----------------|----------|--------|--------|-------|
|                                    |                 |          |        | Lower  | Upper |
| <i>Psychological and health</i>    |                 |          |        |        |       |
| Stress/anxiety                     | 24 <sup>w</sup> | 8,998    | .45    | .16    | .73   |
|                                    | 28 <sup>d</sup> | 9,617    | .41    | .41    | .46   |
| Strain/tension                     | 21 <sup>b</sup> | 7,140    | .48    | .34    | .45   |
|                                    | 39 <sup>f</sup> | 13,781   | .48    | .44    | .53   |
| Burnout                            | 7 <sup>d</sup>  | 1,973    | .35    | .31    | .42   |
| <i>Perceptual</i>                  |                 |          |        |        |       |
| Overall justice                    | 21 <sup>f</sup> | 5,219    | -.55   | -.63   | -.47  |
| Procedural justice                 | 11 <sup>d</sup> | 2,866    | -.63   | -.79   | -.70  |
| Distributive justice               | 8 <sup>d</sup>  | 3,282    | -.39   | -.45   | -.37  |
| Interactional justice              | 4 <sup>d</sup>  | 1,268    | -.68   | -.88   | -.76  |
| Trust                              | 7 <sup>d</sup>  | 4,512    | -.69   | -.90   | -.81  |
|                                    | 7 <sup>f</sup>  | 10,390   | -.78   | -.91   | -.64  |
| Work control                       | 7 <sup>d</sup>  | 4,874    | -.37   | -.42   | -.35  |
| Job empowerment                    | 11 <sup>f</sup> | 6,044    | -.44   | -.55   | -.33  |
| Support                            | 14 <sup>b</sup> | 4,022    | -.62   | -.77   | -.70  |
| Leader-member exchange             | 14 <sup>f</sup> | 5,966    | -.50   | -.56   | -.45  |
| Relationship quality               | 12 <sup>f</sup> | 4,985    | -.44   | -.55   | -.33  |
| Perceived uncertainty              | 10 <sup>f</sup> | 3,963    | .29    | .18    | .40   |
| <i>Attitudinal and intentional</i> |                 |          |        |        |       |
| Job satisfaction                   | 35 <sup>w</sup> | 12,733   | -.45   | -.73   | -.17  |
|                                    | 45 <sup>b</sup> | 16,640   | -.57   | -.51   | -.44  |
|                                    | 61 <sup>d</sup> | 23,804   | -.49   | -.55   | -.52  |
|                                    | 56 <sup>f</sup> | 26,497   | -.56   | -.59   | -.52  |
| Involvement                        | 6 <sup>d</sup>  | 3,601    | -.26   | -.31   | -.23  |
| Overall commitment                 | 25 <sup>w</sup> | 7,237    | -.41   | -.68   | -.14  |
|                                    | 34 <sup>d</sup> | 9,218    | -.42   | -.47   | -.42  |
|                                    | 35 <sup>f</sup> | 9,250    | -.47   | -.54   | -.40  |
|                                    | 33 <sup>b</sup> | 11,633   | -.54   | -.47   | -.38  |
| Affective commitment               | 10 <sup>d</sup> | 4,328    | -.28   | -.32   | -.24  |
| Continuance commitment             |                 |          |        |        |       |
| Cynicism                           | --              | --       | --     | --     | --    |
| Turnover intentions                | 24 <sup>w</sup> | 7,083    | .44    | .17    | .71   |
|                                    | 27 <sup>b</sup> | 8,439    | .43    | .32    | .40   |
|                                    | 34 <sup>d</sup> | 12,462   | .50    | .52    | .57   |
|                                    | 26 <sup>f</sup> | 2,580    | .43    | .34    | .51   |
| <i>Behavioral</i>                  |                 |          |        |        |       |
| Absenteeism                        | 6 <sup>d</sup>  | 1,763    | .11    | .08    | .19   |
| Turnover                           | --              | --       | --     | --     | --    |
| Withdrawal                         | --              | --       | --     | --     | --    |
| Overall OCB                        | 21 <sup>d</sup> | 9,005    | -.23   | -.26   | -.21  |
|                                    | 28 <sup>f</sup> | 4,802    | -.15   | -.21   | -.10  |
| OCB, individual                    | 9 <sup>b</sup>  | 1,913    | -.16   | -.18   | -.09  |
|                                    | 16 <sup>d</sup> | 4,841    | -.29   | -.33   | -.26  |
| OCB, organization                  | 9 <sup>b</sup>  | 1,913    | -.20   | -.20   | -.12  |

|                                     |                 |       |      |      |      |
|-------------------------------------|-----------------|-------|------|------|------|
|                                     | 12 <sup>d</sup> | 2,700 | -.16 | -.21 | -.12 |
| Task performance (in-role)          | 20 <sup>a</sup> | 6,949 | -.11 | -.20 | .01  |
|                                     | 14 <sup>b</sup> | 3,397 | -.20 | -.16 | -.09 |
|                                     | 33 <sup>f</sup> | 5,100 | -.27 | -.37 | -.17 |
| Job performance (self-report)       | 8 <sup>d</sup>  | 3,039 | -.11 | -.15 | -.06 |
| Job performance (supervisor-report) | 21 <sup>d</sup> | 7,128 | -.16 | -.19 | -.14 |
| Political behavior                  | --              | --    | --   | --   | --   |
| Counterproductive work behavior     | 9 <sup>d</sup>  | 2,990 | .42  | .40  | .49  |

*Note.*  $k$  = number of effect sizes in each meta-analytic analysis;  $N$  = total number of observations in each  $k$  sample;  $\rho$  = mean weighted correlation coefficient corrected for sampling error and measurement unreliability; CI = confidence interval.

<sup>a</sup>Miller, Rutherford, & Kolodinsky (2008)

<sup>b</sup>Chang, Rosen, & Levy (2009)

<sup>c</sup>Atinc, Darrat, Fuller, & Parker (2010)

<sup>d</sup>Bedi & Schat (2013)

<sup>e</sup>Munyon, Summers, Thompson, & Ferris (2013)

<sup>f</sup>Watkins, Smith, Long, & Christian (2014)

## Online Supplemental Appendix D

### Additional References from Table 1 and Online Supplemental Appendix C

- <sup>c</sup>Atinc, G., Darrat, M., Fuller, B., & Parker, B. 2010. Perceptions of organizational politics: A meta-analysis of theoretical antecedents. *Journal of Managerial Issues*, 22: 494-513.
- <sup>h</sup>Andrews, M., & Kacmar, K. 2001. Discriminating among organizational politics, justice, and support. *Journal of Organizational Behavior*, 22: 347-366.
- <sup>k</sup>Aryee, S., Chen, Z., & Budhwar, P. 2004. Exchange fairness and employee performance: An examination of the relationship between organizational politics and procedural justice. *Organizational Behavior and Human Decision Processes*, 94: 1-14.
- <sup>d</sup>Bedi, A., & Schat, A. 2013. Perceptions of organizational politics: A meta-analysis of its attitudinal, health, and behavioral consequences. *Canadian Psychologist*, 54: 246-259.
- <sup>q</sup>Byrne, Z. 2005. Fairness reduces the negative effects of organizational politics on turnover intentions, citizenship behavior and job performance. *Journal of Business and Psychology*, 20: 175-200.
- <sup>g</sup>Byrne, Z., Kacmar, C., Stoner, J., & Hochwarter, W. 2005. The relationship between perceptions of politics and depressed mood at work: Unique moderators across three levels. *Journal of Occupational Health Psychology*, 10: 330-343.
- <sup>b</sup>Chang, C., Rosen, C., & Levy, P. 2009. The relationship between perceptions of organizational politics and employee attitudes, strain, and behavior: A meta-analytic examination. *Academy of Management Journal*, 52: 779-801.
- <sup>ab</sup>Dawson, K., O'Brien, K., & Beehr, T. 2016. The role of hindrance stressors in the job demand–control–support model of occupational stress: A proposed theory revision. *Journal of Organizational Behavior*, 37: 397-415.

- <sup>n</sup>De Clercq, D., Haq, I., & Azeem, M. 2018. The roles of informational unfairness and political climate in the relationship between dispositional envy and job performance in Pakistani organizations. *Journal of Business Research*, 82: 117-126.
- <sup>j</sup>Graves, L., Cullen, K., Lester, H., Ruderman, M., & Gentry, W. 2015. Managerial motivational profiles: Composition, antecedents, and consequences. *Journal of Vocational Behavior*, 87: 32-42.
- <sup>i</sup>Halbesleben, J., & Wheeler, A. 2006. The relationship between perceptions of politics, social support, withdrawal, and performance. In E. Vigoda-Gadot & A. Drory (Eds.), *Handbook of organizational politics*: 253-270. Cheltenham, UK: Edward Elgar.
- <sup>l</sup>Harris, K., Andrews, M., & Kacmar, K. 2007. The moderating effects of justice on the relationship between organizational politics and workplace attitudes. *Journal of Business and Psychology*, 22: 135-144.
- <sup>u</sup>Harris, K., & Kacmar, K. 2005. Easing the strain: The buffer role of supervisors in the perceptions of politics-strain relationship. *Journal of Occupational and Organizational Psychology*, 78: 337-354.
- <sup>aa</sup>Hochwarter, W., Kacmar, C., Perrewé, P., & Johnson, D. 2003. Perceived organizational support as a mediator of the relationship between politics perceptions and work outcomes. *Journal of Vocational Behavior*, 63: 438-456.
- <sup>t</sup>Hochwarter, W., Kacmar, K., Treadway, D., & Watson, T. 2003. It's all relative: The distinction and prediction of political perceptions across levels. *Journal of Applied Social Psychology*, 33: 1995-2016.

- <sup>z</sup>Huang, I., Chuang, C., & Lin, H. 2003. The role of burnout in the relationship between perceptions off organizational politics and turnover intentions. *Public Personnel Management*, 32: 519-531.
- <sup>y</sup>James, M., & Shaw, J. 2016. Cynicism across levels in the organization. *Journal of Managerial Issues*, 28: 83-100.
- <sup>p</sup>Kaya, N., Aydin, S., & Ayhan, O. 2016. The effects of organizational politics on perceived organizational justice and intention to leave. *American Journal of Industrial and Business Management*, 6: 249-258.
- <sup>t</sup>Kiewitz, C., Restubog, S., Zagenczyk, T., & Hochwarter, W. 2009. The interactive effects of psychological contract breach and organizational politics on perceived organizational support: Evidence from two longitudinal studies. *Journal of Management Studies*, 46: 806-834.
- <sup>m</sup>Miller, B., & Nicols, K. 2008. Politics and justice: A mediated moderation model. *Journal of Managerial Issues*, 20: 214-237.
- <sup>a</sup>Miller, B., Rutherford, M., & Kolodinsky, R. 2008. Perceptions of organizational politics: A meta-analysis of outcomes. *Journal of Business and Psychology*, 22: 209-222.
- <sup>e</sup>Munyon, T., Summers, J., Thompson, K., & Ferris, G. 2015. Political skill and work outcomes: A theoretical extension, meta-analytic investigation, and agenda for the future. *Personnel Psychology*, 68: 143-184.
- <sup>w</sup>Parker, C., Dipboye, R., & Jackson, S. 1995. Perceptions of organizational politics: An investigation of antecedents and consequences. *Journal of Management*, 21: 891-912.
- <sup>x</sup>Poon, J. 2003. Situational antecedents and outcomes of organizational politics perceptions. *Journal of Managerial Psychology*, 18: 138-155.

- <sup>s</sup>Rosen, C., Chang, C., Johnson, R., & Levy, P. 2009. Perceptions of the organizational context and psychological contract breach: Assessing competing perspectives. *Organizational Behavior and Human Decision Processes*, 108: 202-217.
- <sup>o</sup>Thomas, A. 2018. *Development and Validation of a Multidimensional Political Behavior Scale*. Unpublished doctoral dissertation, University of Missouri-St. Louis.
- <sup>f</sup>Watkins, M., Smith, A., Cooke, E., & Christian, M. 2014. The role of culture on perceptions of organizational politics and work outcomes: A meta-analysis. *Academy of Management Proceedings*, 1: 16529.
- <sup>v</sup>Witt, L., Andrews, M., & Kacmar, K. 2000. The role of participation in decision-making in the organizational politics-job satisfaction relationship. *Human Relations*, 53: 341-358.
